# Supplementary figures and images for: Muscleblind-like 1 suppresses breast cancer metastatic colonization and stabilizes metastasis suppressor transcripts
Source: PubMed Central journal article supplement — Genes Dev. 2016 Feb 15;30(4):386–98. doi: 10.1101/gad.270645.115 (PMC4762424; doi:10.1101/gad.270645.115), 2016-02-15

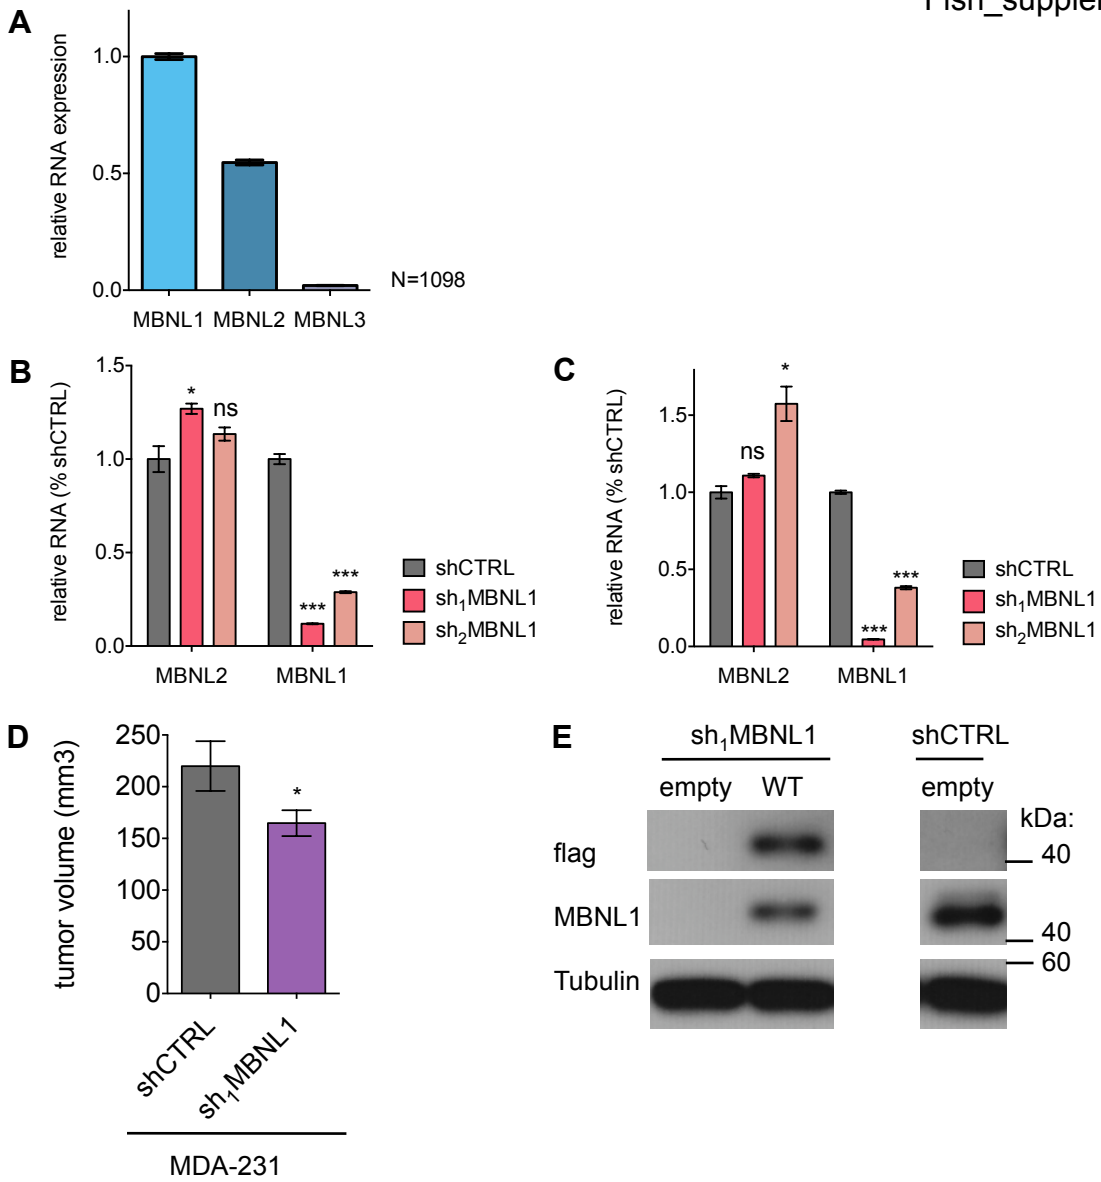

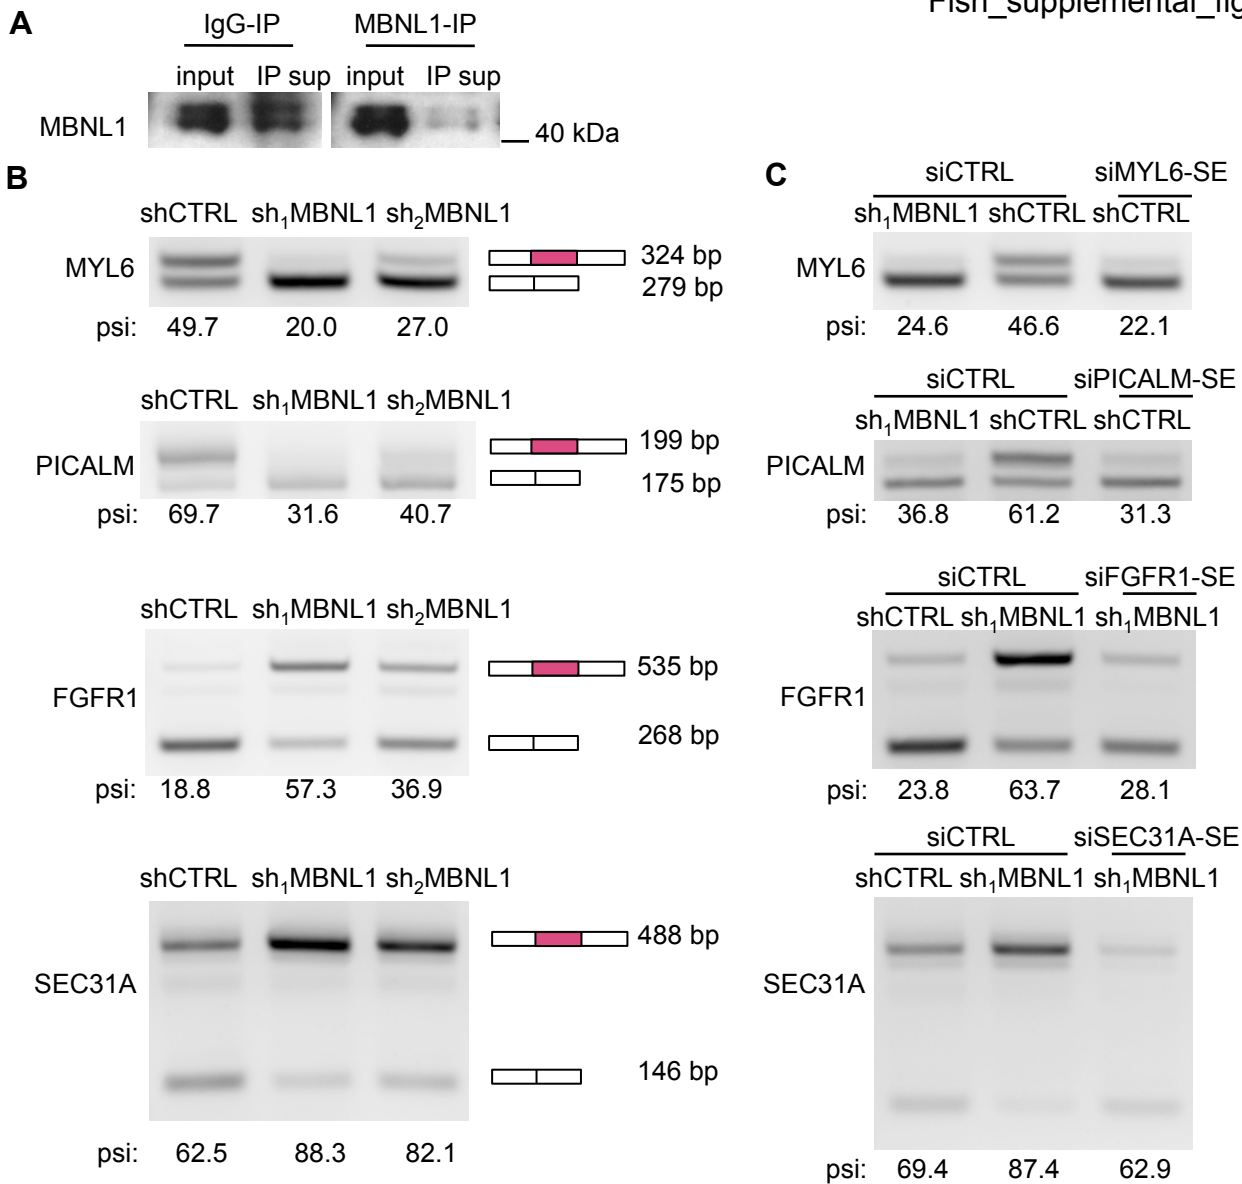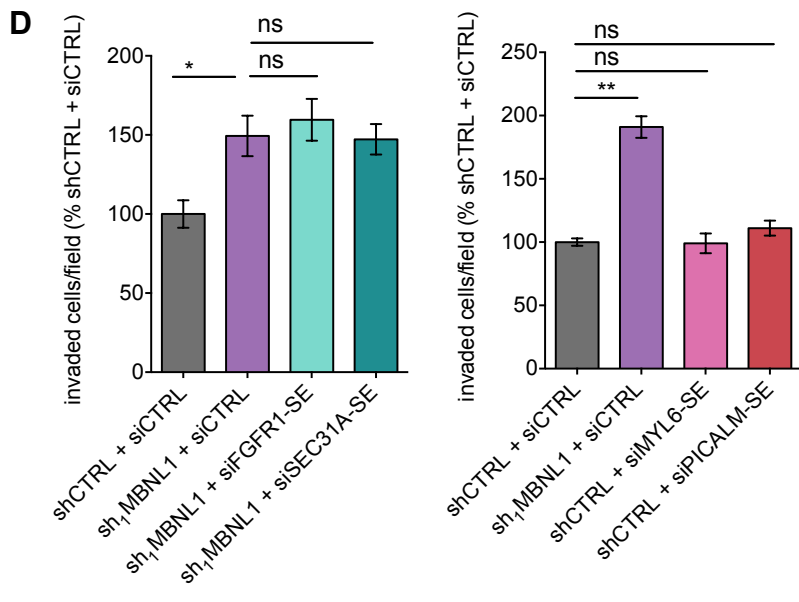

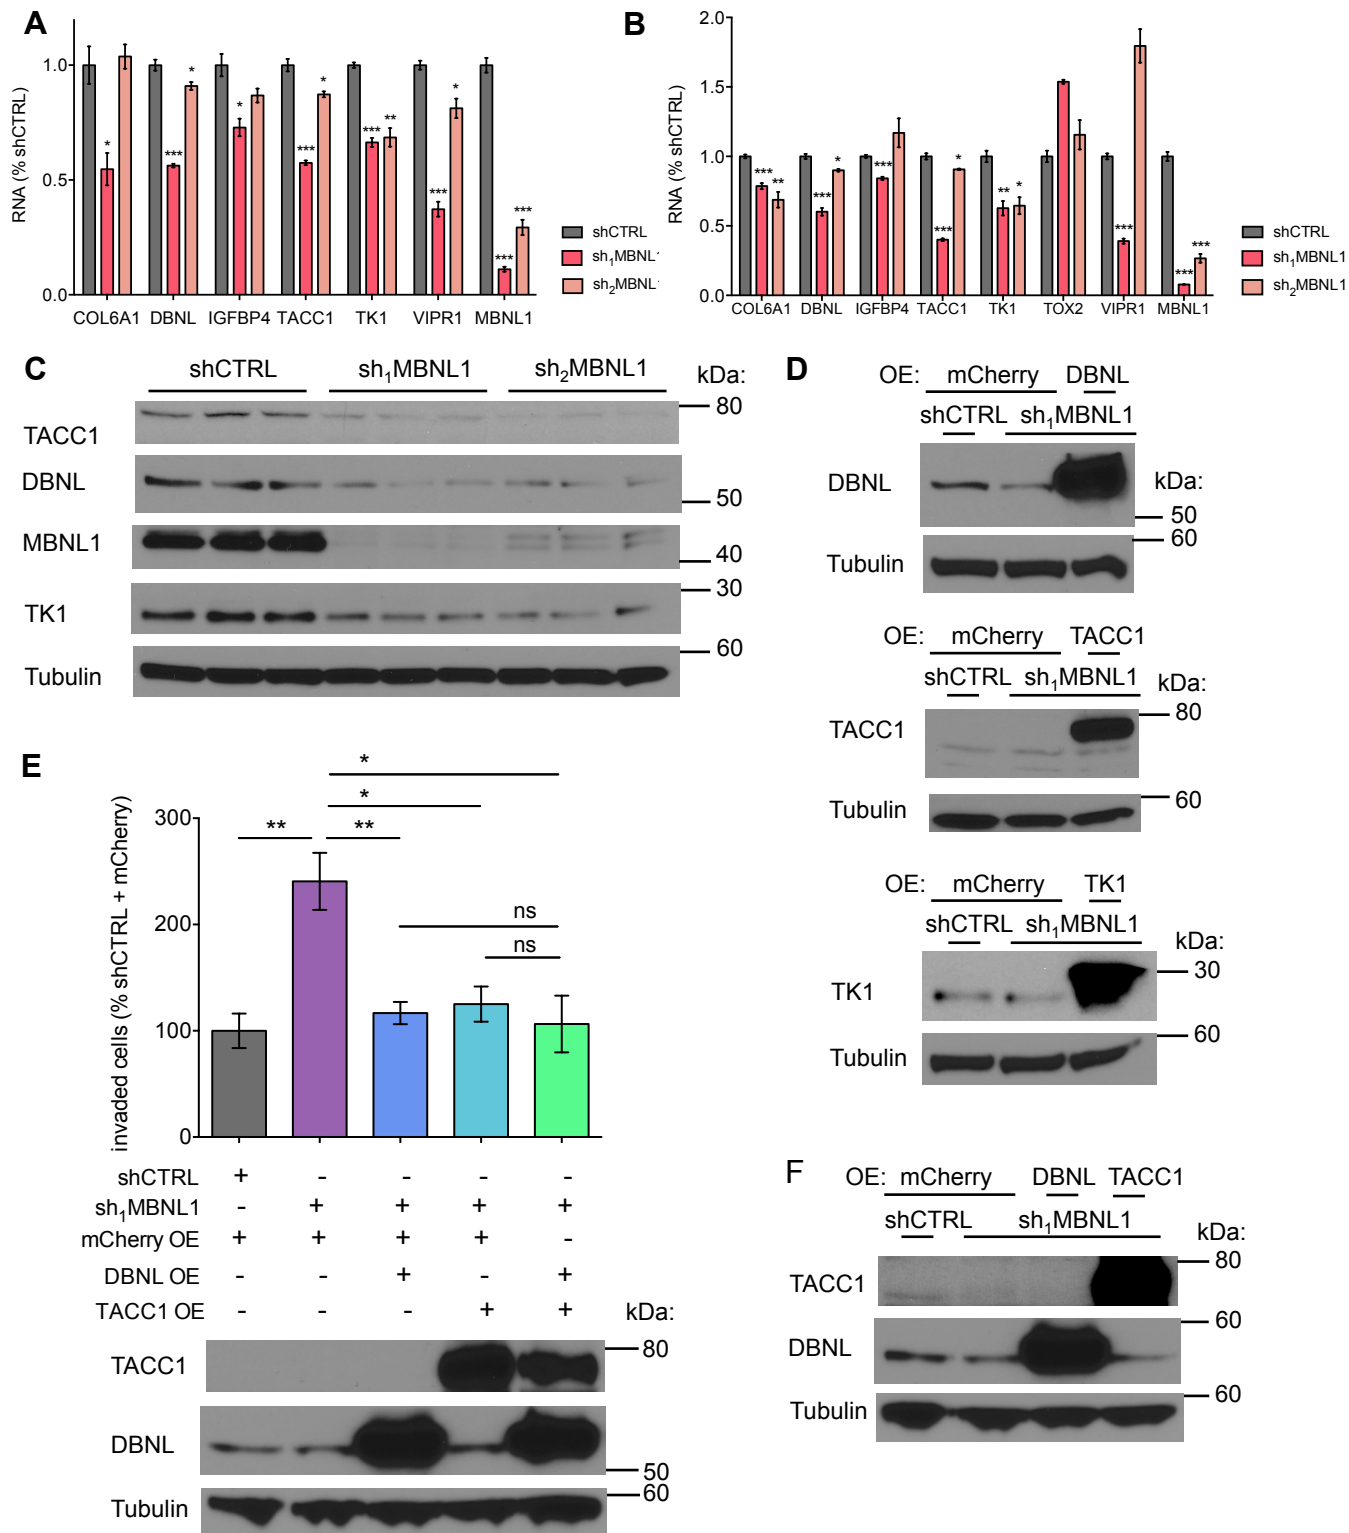

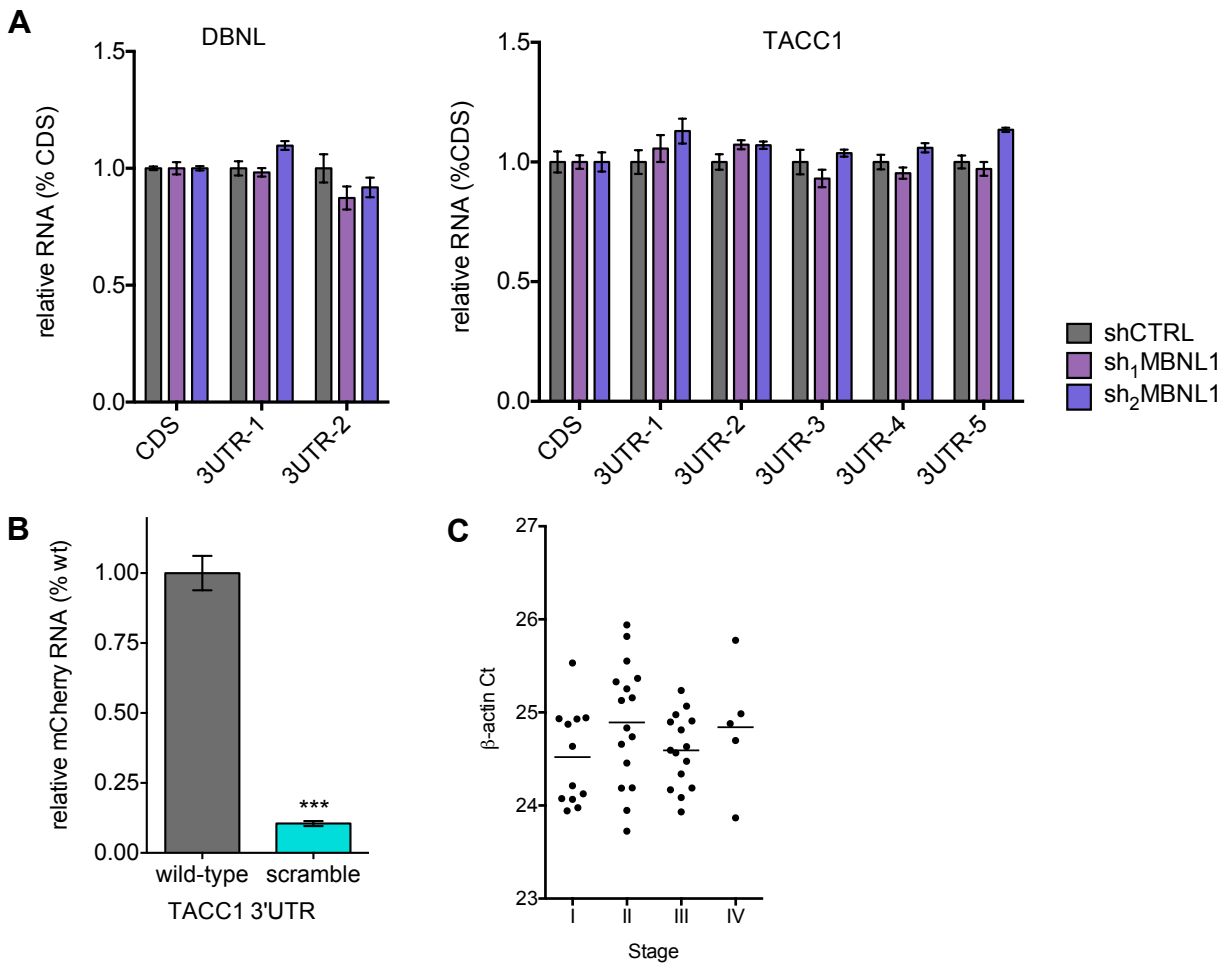

Supplement: supp_30.4.386_SuppFigsS1-S4.pdf [file supp_30.4.386_SuppFigsS1-S4.pdf]
